# Supplementary material for: Listeria monocytogenes Wall Teichoic Acid Glycosylation Promotes Surface Anchoring of Virulence Factors, Resistance to Antimicrobial Peptides, and Decreased Susceptibility to Antibiotics
Source: MDPI journal article supplement (doi:10.3390/pathogens9040290), 2020-04-16
Supplement: s1 [file s1]

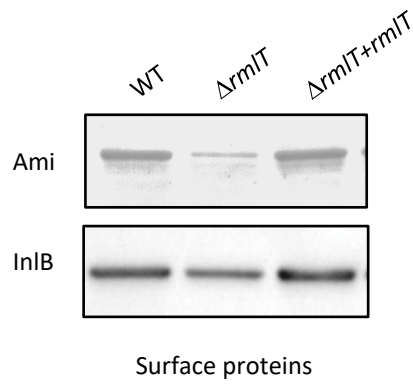

WTA-glycosylation promotes surface association of *Lm* virulence factors. Western blot on extracts of non-covalently cell surface associated *Lm* proteins obtained from WT,  $\Delta rmIT$  and  $\Delta rmIT+rmIT$  strains. Images are representative of at least three independent experiments.

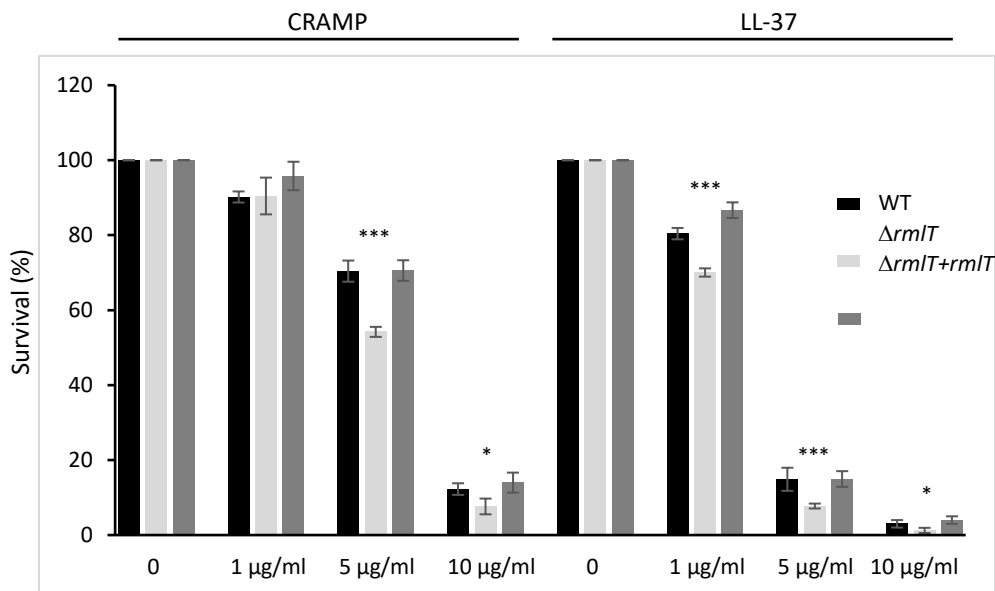

WTA-glycosylation promotes *Lm* resistance against AMPs. Quantification of viable *Lm* after incubation of exponential-phase WT,  $\Delta rmIT$  and  $\Delta rmIT+rmIT$  strains with the antimicrobial peptides CRAMP and LL-37. Values from AMP-treated samples were normalized to untreated controls (set at 100). Data represent mean $\pm$ SD of at least three independent experiments. (\*,  $p < 0.05$ ; \*\*\*,  $p < 0.001$ ).

**Figure S1.** Restoration of WT phenotypes for the  $\Delta rmIT$  mutant after re-introducing the *rmIT* gene.
